# Supplementary material for: Osteoimmune reaction caused by a novel silicocarnotite bioceramic promoting osteogenesis through the MAPK pathway
Source: Royal Society of Chemistry journal article supplement (doi:10.1039/d2bm00125j), 2022-01-01
Supplement: d2bm00125j1.pdf [file d2bm00125j1.pdf]

## **Osteoimmune reaction caused by novel silicocarnotite bioceramic promoting osteogenesis through MAPK pathway**

*Xianzhuo Han<sup>a,1</sup>, Fanyan Deng<sup>b,c,1</sup>, Rui Zhu<sup>a</sup>, Ke Li<sup>c</sup>, Shun Yang<sup>c</sup>, Liou Jin<sup>e</sup>, Congqin Ning<sup>b,\*</sup>, Xiujuan Shi<sup>a,d,\*</sup>, Yongming Li<sup>a,\*</sup>*

<sup>a</sup> Department of Orthodontics, School and Hospital of Stomatology, Shanghai Engineering Research Center of Tooth Restoration and Regeneration, Tongji University, Shanghai 200072, China.

<sup>b</sup> The Education Ministry Key Lab of Resource Chemistry and Shanghai Key Laboratory of Rare Earth Functional Materials, Shanghai Normal University, Shanghai 200234, China.

<sup>c</sup> State Key Laboratory of High Performance Ceramics and Superfine Microstructure, Institute of Ceramics, Chinese Academy of Sciences, Shanghai 200050, China

<sup>d</sup> School of Medicine, Tongji University, Shanghai 200092, China.

<sup>e</sup> Department of Maxillofacial Surgery, Hospital of Stomatology, Jilin University, Changchun 130021, Jilin Province, China.

<sup>1</sup> Xianzhuo Han and Fanyan Deng contributed equally to the article.

\* Congqin Ning, Xiujuan Shi and Yongming Li are corresponding authors.

E-mail addresses: cqning@shnu.edu.cn (C.Q. Ning), xiujuansh@tongji.edu.cn (X.J. Shi), liyongming@tongji.edu.cn (Y.M. Li).

Supplementary Table 1 Primers used in the qRT-PCR test of RAW 264.7 cells

| <b>Gene</b>   | <b>Primer' sequences (5' to 3')</b>                   |
|---------------|-------------------------------------------------------|
| GAPDH         | F:AGGTCGGTGTGAACGGATTTG<br>R:TGTAGACCATGTAGTTGAGGTCA  |
| CD80          | F:TCAGTTGATGCAGGATACACCA<br>R: AAAGACGAATCAGCAGCACAA  |
| TNF- $\alpha$ | F:CAGGCGGTGCCTATGTCTC<br>R: CGATCACCCCGAAGTTCAGTAG    |
| CD206         | F:CTCTGTTTCAGCTATTGGACGC<br>R:TGGCACTCCCAAACATAATTTGA |
| IL-4          | F:CCCCAGCTAGTTGTCATCCTG<br>R: CAAGTGATTTTTGTTCGCATCCG |
| ARG-1         | F:CCAGATGTACCAGGATTCTC<br>R: AGCAGGTAGCTGAAGGTCTC     |
| IL-10         | F:ACTCTTCACCTGCTCCACTG<br>R: GCTATGCTGCCTGCTCTTAC     |
| IL-1 $\beta$  | F:TGGAGAGTGTGGATCCCAAG<br>R: GGTGCTGATGTACCAGTTGG     |

Supplementary Table 2 Primers used in the qRT-PCR test of rBMSCs cells

| <b>Gene</b>    | <b>Primer' sequences (5' to 3')</b>           |
|----------------|-----------------------------------------------|
| $\beta$ -actin | GTAAAGACCTCTATGCCAACA<br>GGACTCATCGTACTCCTGCT |

|       |                                                    |
|-------|----------------------------------------------------|
| BSP   | CAGGACTGCCGAAGGAAGAAA<br>GGCCGGTACTTAAAGACCCC      |
| COL1  | CTGCCAGAAGAATATGTATCACC<br>GAAGCAAAGTTTCCTCCAAGACC |
| ALP   | TATGTCTGGAACCGCACTGAAC<br>CACTAGCAAGAAGAAGCCTTTGG  |
| OCN   | GCCCTGACTGCATTCTGCCTCT<br>TCACCACCTTACTGCCCTCCTG   |
| SP7   | CAGTAATCTTCGTGCCAGACCT<br>TAGTGAGCTTCTTCCTGGGGA    |
| RUNX2 | GCGGTGCAAACCTTCTCCAG<br>TCACTGCACTGAAGAGGCTG       |

---

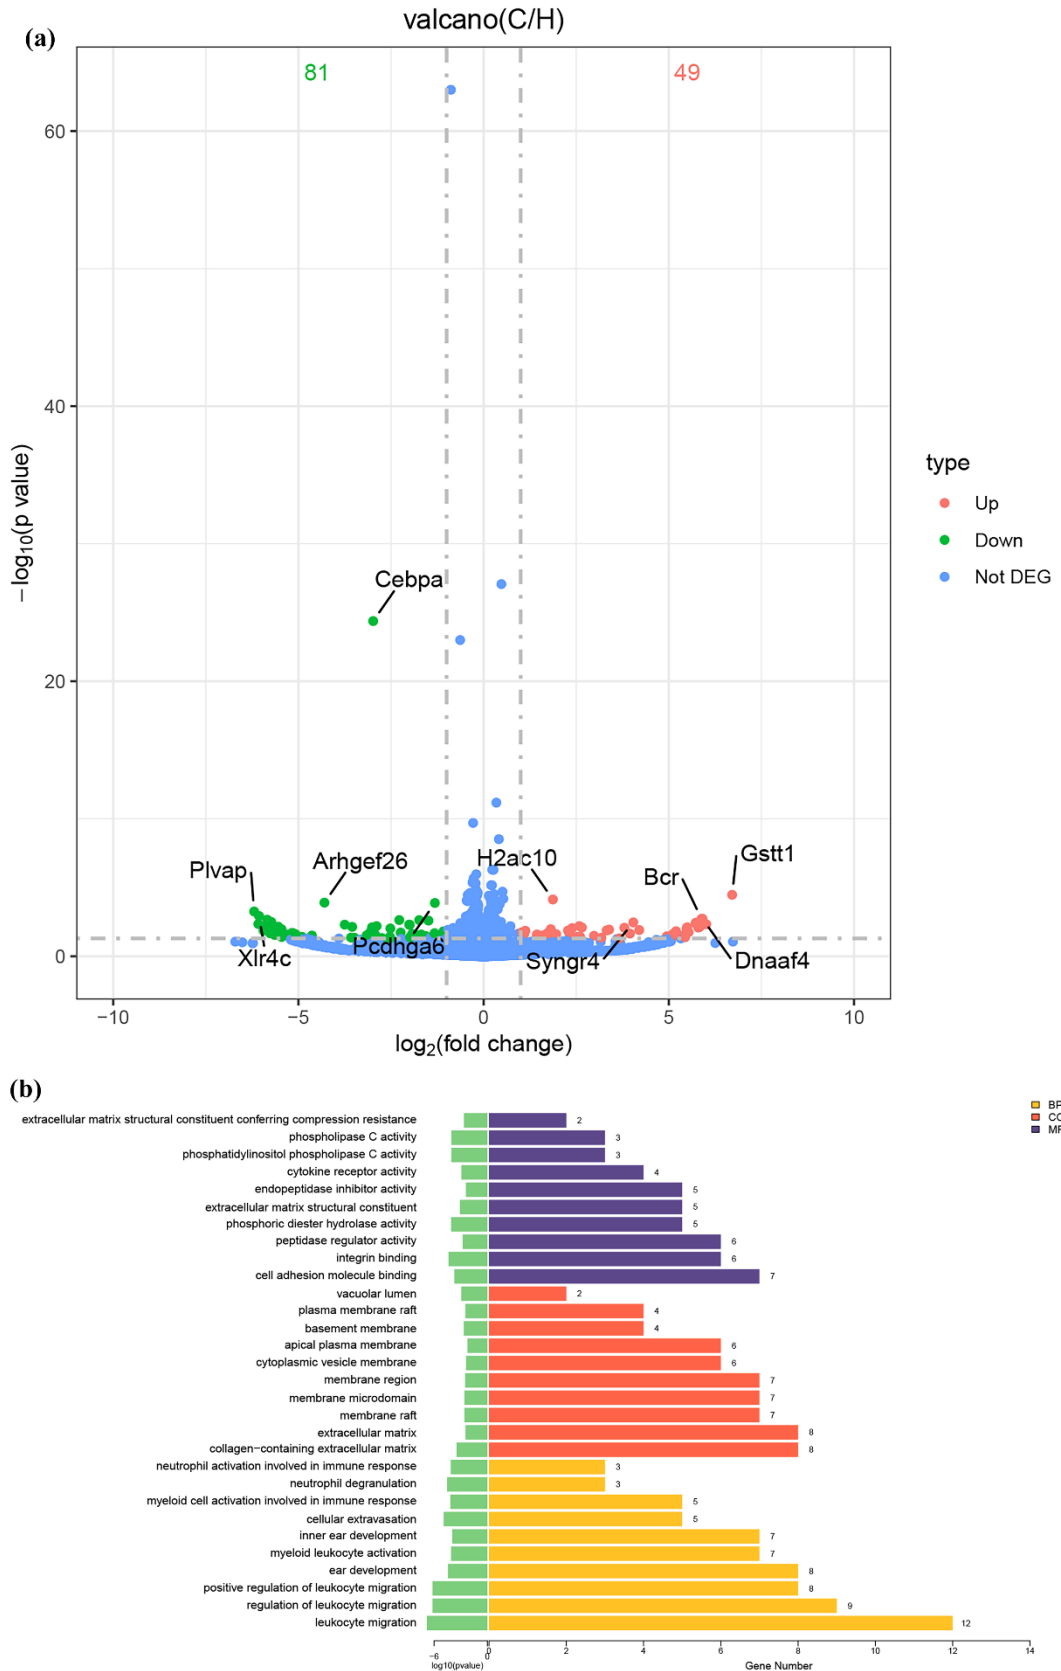

Supplementary Fig. 1. (a) Volcano plot and (b) Barplot of GO biological process (BP), cellular components (CC), molecular function (MF) terms.
